# Supplementary material for: The effect of temperature on male mating signals and female choice in the red mason bee, Osmia bicornis (L.)
Source: PubMed Central journal article supplement (PMC5677480; doi:10.1002/ece3.3331), 2017-09-23
Supplement: ECE3-7-8966-s001.pdf [file ECE3-7-8966-s001.pdf]

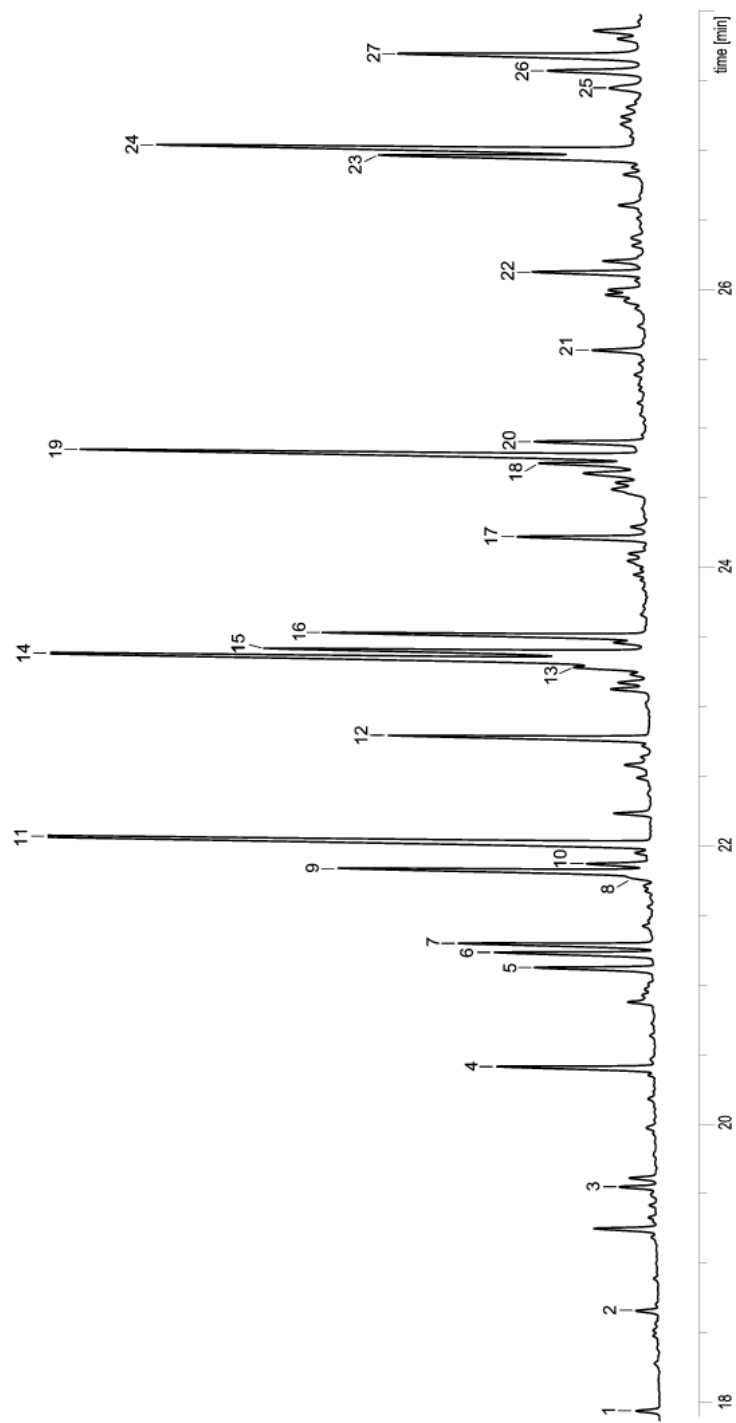

**Supplementary Figure 1: Gas chromatogram of a male *O. bicornis* antennal extract.**

Chemical separations were performed on a non-polar DB-5 mass spectrometry (MS) column and labelled peaks were identified using GC/MS. Numbered peaks correspond to the compounds listed in table 1.
